# Supplementary material for: Residue-specific binding mechanisms of PD-L1 to its monoclonal antibodies by computational alanine scanning
Source: Royal Society of Chemistry journal article supplement (doi:10.1039/d1cp01281a), 2021-01-01
Supplement: d1cp01281a1.pdf [file d1cp01281a1.pdf]

## Supporting Information

### **Residue-Specific Binding Mechanisms of PD-L1 to Its Monoclonal Antibodies by Computational Alanine Scanning**

Wei Wen<sup>1</sup>, Dading Huang<sup>1</sup>, Jingxiao Bao<sup>1</sup>, and John Z.H. Zhang<sup>1,2,3,4\*</sup>

*<sup>1</sup>Shanghai Engineering Research Center of Molecular Therapeutics & New Drug Development, Shanghai Key Laboratory of Green Chemistry & Chemical Process, School of Chemistry and Molecular Engineering, East China Normal University, Shanghai 200062, China*

*<sup>2</sup>NYU-ECNU Center for Computational Chemistry at NYU Shanghai, Shanghai 200062, China*

*<sup>3</sup>Department of Chemistry, New York University, NY, NY 10003, USA*

*<sup>4</sup>Collaborative Innovation Center of Extreme Optics, Shanxi University, Taiyuan, Shanxi 030006, China*

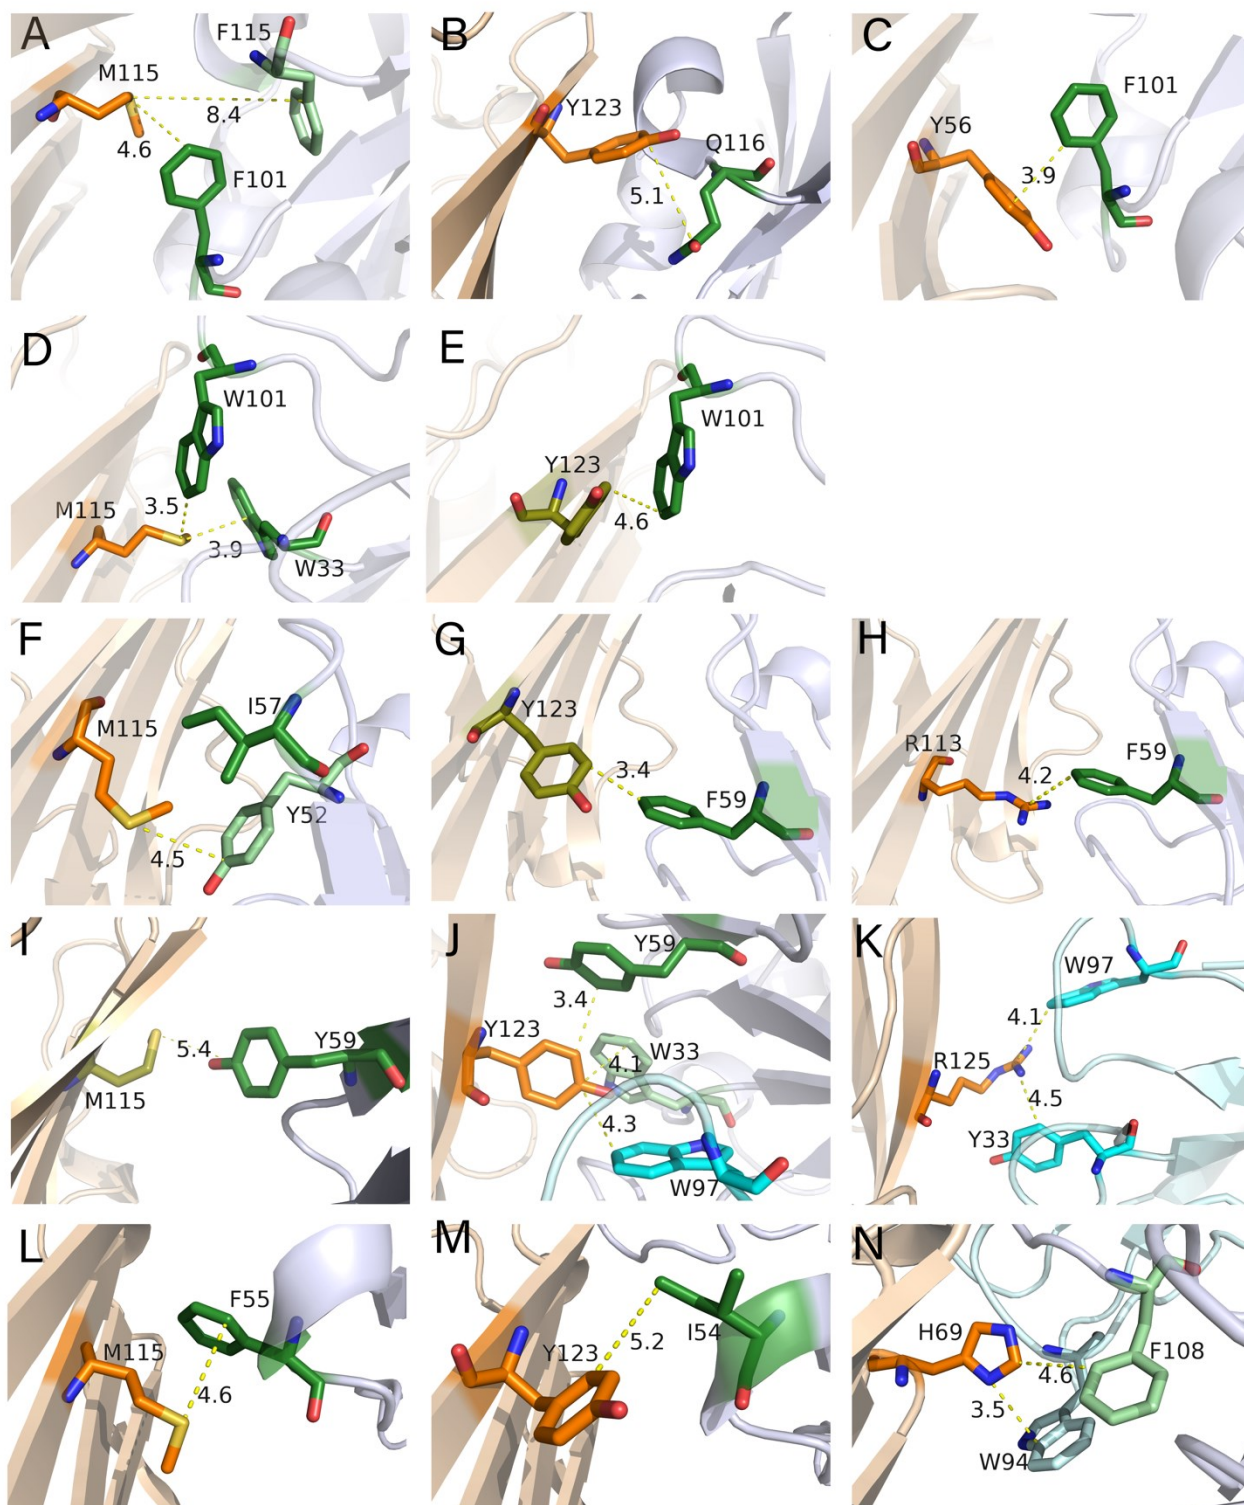

**Figure S1.** Detailed interactions of the hotspots of PD-L1 in 5 PD-L1/mAb systems. The chains of PD-L1 are colored in wheat. The heavy chains of mAb are colored in light purple and light chain in cyan. Residues are colored according to their location: orange, on PD-L1; green, on heavy chain of mAb; cyan, on light chain of mAb. Residues are also colored by  $\Delta\Delta G$  values: darker color for hotspots (typically defined as  $> 2$  kcal/mol); lighter color for warm spots, 1 to 2 kcal/mol. The atom coloring style is red for oxygen and blue for nitrogen and yellow for sulfur. For clarity, the color of warm spot in PD-L1 is changed from light orange to dark olive. The shortest distance between the atoms in aromatic-

aromatic, sulfur-aromatic and cation-aromatic binding residues are marked and presented by yellow dash lines. A-C, D-E, F-H, I-K and L-N are respectively for PD-L1/KN035, PD-L1/atezolizumab, PD-L1/avelumab, PD-L1/durvalumab and PD-L1/BMS-936559.

**Table S1.** Prediction on hotspots and warm spots in PD-L1/avelumab system (PDB code 5GRJ).

| Chain               | Mutation | $\Delta\Delta E_{\text{vdw}}$ | $\Delta\Delta E_{\text{ele}}$ | $\Delta\Delta G_{\text{gb}}$ | $\Delta\Delta G_{\text{np}}$ | $\Delta\Delta H$ | $-\Delta\Delta S$ | $\Delta\Delta G$ | Sd <sup>a</sup> |
|---------------------|----------|-------------------------------|-------------------------------|------------------------------|------------------------------|------------------|-------------------|------------------|-----------------|
| <b>(A) PD-L1</b>    |          |                               |                               |                              |                              |                  |                   |                  |                 |
| A                   | R113A    | 5.24                          | -11.43                        | 11.35                        | 0.51                         | 5.66             | -1.20             | 4.47             | 0.73            |
| A                   | Y56A     | 3.78                          | 2.05                          | -1.30                        | 0.05                         | 4.58             | -0.74             | 3.84             | 1.07            |
| A                   | D61A     | -0.55                         | 34.74                         | -28.77                       | 0.22                         | 5.65             | -2.98             | 2.67             | 0.43            |
| A                   | Q66A     | 2.53                          | 1.70                          | -1.32                        | 0.03                         | 2.95             | -0.40             | 2.55             | 0.60            |
| A                   | I54A     | 2.59                          | -0.26                         | -0.09                        | 0.04                         | 2.28             | -0.21             | 2.07             | 0.23            |
| A                   | M115A    | 2.82                          | -0.44                         | 0.00                         | -0.06                        | 2.32             | -0.3              | 2.02             | 0.34            |
| A                   | H78A     | 1.80                          | 0.78                          | -0.67                        | 0.29                         | 2.20             | -0.36             | 1.84             | 0.28            |
| A                   | V76A     | 2.74                          | -0.04                         | -0.85                        | 0.08                         | 1.92             | -0.19             | 1.73             | 0.69            |
| A                   | N63A     | 1.90                          | -0.20                         | -0.05                        | -0.02                        | 1.64             | -0.07             | 1.57             | 0.34            |
| A                   | K75A     | 2.61                          | -12.07                        | 11.42                        | 0.41                         | 2.37             | -1.02             | 1.35             | 0.60            |
| A                   | R125     | 1.83                          | -4.51                         | 4.89                         | 0.36                         | 2.57             | -1.34             | 1.23             | 0.67            |
| A                   | Y123A    | 1.63                          | 0.05                          | -0.64                        | 0.22                         | 1.26             | -0.09             | 1.18             | 0.23            |
| A                   | E58A     | 0.70                          | 19.21                         | -17.18                       | -0.06                        | 2.67             | -1.60             | 1.07             | 1.52            |
| A                   | E60A     | 1.42                          | 16.93                         | -16.58                       | 0.11                         | 1.88             | -0.86             | 1.02             | 0.71            |
| <b>(B) avelumab</b> |          |                               |                               |                              |                              |                  |                   |                  |                 |
| H                   | I57A     | 5.71                          | 0.14                          | -1.04                        | 0.18                         | 4.99             | -0.57             | 4.42             | 0.12            |
| L                   | Y93A     | 4.39                          | 1.29                          | -1.77                        | 0.04                         | 3.95             | -0.42             | 3.53             | 0.14            |
| L                   | Y34A     | 3.66                          | 4.96                          | -5.27                        | 0.56                         | 3.91             | -0.73             | 3.18             | 0.67            |
| H                   | F59A     | 4.07                          | 2.73                          | -3.53                        | 0.34                         | 3.61             | -0.67             | 2.94             | 0.44            |
| H                   | V104A    | 3.23                          | 0.35                          | -0.02                        | 0.01                         | 3.58             | -1.04             | 2.54             | 1.00            |
| L                   | R99A     | 0.38                          | 18.76                         | -16.12                       | -0.02                        | 3.01             | -0.62             | 2.38             | 0.42            |
| H                   | I33A     | 2.06                          | 0.27                          | -0.12                        | 0.02                         | 2.23             | -0.10             | 2.14             | 0.25            |
| H                   | Y52A     | 1.81                          | 4.95                          | -3.91                        | 0.08                         | 2.93             | -1.00             | 1.93             | 0.69            |
| H                   | T103A    | 1.50                          | -0.90                         | 1.26                         | 0.03                         | 1.90             | -0.02             | 1.88             | 0.21            |
| H                   | L101A    | 2.57                          | -0.24                         | -0.38                        | -0.06                        | 1.89             | -0.18             | 1.71             | 0.18            |
| L                   | S97A     | 0.43                          | 3.68                          | -2.42                        | 0.02                         | 1.72             | -0.49             | 1.23             | 0.57            |

<sup>a</sup>Standard deviation of  $\Delta\Delta G$ .

**Table S2.** Prediction on hotspots and warm spots in PD-L1/durvalumab system (PDB code 5X8M).

| Chain                 | Mutation | $\Delta\Delta E_{\text{vdw}}$ | $\Delta\Delta E_{\text{clc}}$ | $\Delta\Delta G_{\text{gb}}$ | $\Delta\Delta G_{\text{np}}$ | $\Delta\Delta H$ | $-\Delta\Delta S$ | $\Delta\Delta G$ | Sd <sup>a</sup> |
|-----------------------|----------|-------------------------------|-------------------------------|------------------------------|------------------------------|------------------|-------------------|------------------|-----------------|
| <b>(A) PD-L1</b>      |          |                               |                               |                              |                              |                  |                   |                  |                 |
| A                     | R125A    | 4.53                          | 10.79                         | -8.17                        | 0.61                         | 7.76             | -2.98             | 4.78             | 0.68            |
| A                     | Y123A    | 5.33                          | 0.46                          | -1.07                        | 0.27                         | 4.99             | -0.58             | 4.41             | 0.19            |
| A                     | R113A    | 1.64                          | 2.34                          | 1.17                         | 0.01                         | 5.16             | -2.67             | 2.49             | 0.54            |
| A                     | D122A    | 1.35                          | 8.07                          | -7.44                        | 0.04                         | 2.02             | -0.29             | 1.73             | 0.06            |
| A                     | E58A     | 0.68                          | 13.62                         | -11.41                       | 0.11                         | 3.00             | -1.32             | 1.68             | 0.32            |
| A                     | K124A    | 3.19                          | -7.25                         | 6.45                         | 0.20                         | 2.59             | -1.01             | 1.58             | 0.21            |
| A                     | V111A    | 2.15                          | 0.33                          | -0.97                        | 0.04                         | 1.55             | -0.32             | 1.22             | 0.30            |
| A                     | E60A     | 1.54                          | 8.51                          | -8.36                        | 0.12                         | 1.81             | -0.67             | 1.15             | 0.21            |
| A                     | M115A    | 1.90                          | 1.86                          | -2.00                        | 0.07                         | 1.82             | -0.68             | 1.14             | 0.17            |
| <b>(B) durvalumab</b> |          |                               |                               |                              |                              |                  |                   |                  |                 |
| B                     | F103A    | 7.23                          | 1.72                          | -4.37                        | 0.53                         | 7.11             | -0.77             | 6.35             | 0.64            |
| B                     | Y59A     | 4.05                          | -0.91                         | 0.91                         | 0.33                         | 4.36             | -0.36             | 4.00             | 0.16            |
| C                     | W97A     | 2.24                          | 3.55                          | -1.21                        | 0.02                         | 4.61             | -1.32             | 3.29             | 1.16            |
| C                     | Y33A     | 2.85                          | 0.86                          | -1.22                        | 0.22                         | 2.71             | -0.32             | 2.39             | 0.40            |
| B                     | K52A     | 1.26                          | 11.09                         | -9.68                        | 0.22                         | 2.88             | -1.25             | 1.63             | 0.20            |
| B                     | W33A     | 3.05                          | 7.55                          | -7.36                        | -0.03                        | 3.20             | -1.60             | 1.60             | 0.93            |
| C                     | L95A     | 2.20                          | 0.55                          | -0.94                        | -0.03                        | 1.78             | -0.29             | 1.49             | 0.18            |
| B                     | E105A    | 1.64                          | -0.55                         | 0.73                         | 0.03                         | 1.84             | -0.52             | 1.32             | 0.17            |

<sup>a</sup>Standard deviation of  $\Delta\Delta G$ .

**Table S3.** Prediction on hotspots and warm spots in PD-L1/BMS-936559 system (PDB code 5GGT).

| Chain                 | Mutation | $\Delta\Delta E_{\text{vdw}}$ | $\Delta\Delta E_{\text{clc}}$ | $\Delta\Delta G_{\text{gb}}$ | $\Delta\Delta G_{\text{np}}$ | $\Delta\Delta H$ | $-\Delta\Delta S$ | $\Delta\Delta G$ | Sd <sup>a</sup> |
|-----------------------|----------|-------------------------------|-------------------------------|------------------------------|------------------------------|------------------|-------------------|------------------|-----------------|
| <b>(A) PD-L1</b>      |          |                               |                               |                              |                              |                  |                   |                  |                 |
| A                     | H69A     | 4.09                          | 0.91                          | -1.28                        | 0.34                         | 4.06             | -0.79             | 3.27             | 0.49            |
| A                     | I54A     | 3.44                          | -0.25                         | -0.33                        | 0.12                         | 2.97             | -0.34             | 2.63             | 0.20            |
| A                     | M115A    | 2.70                          | -1.03                         | 0.93                         | 0.11                         | 2.12             | -0.50             | 2.22             | 0.68            |
| A                     | Y123A    | 2.62                          | -0.22                         | -0.33                        | 0.28                         | 2.35             | -0.22             | 2.13             | 0.19            |
| A                     | Y56A     | 1.88                          | 0.69                          | -0.91                        | 0.20                         | 1.86             | -0.34             | 1.52             | 0.82            |
| A                     | E58A     | 0.26                          | 16.63                         | -15.58                       | 0.06                         | 1.37             | -0.00             | 1.37             | 0.39            |
| A                     | V68A     | 1.47                          | -0.07                         | -0.18                        | 0.00                         | 1.22             | -0.14             | 1.08             | 0.32            |
| A                     | Q66A     | 0.77                          | 4.41                          | -4.17                        | 0.12                         | 1.13             | -0.08             | 1.05             | 0.24            |
| <b>(B) BMS-936559</b> |          |                               |                               |                              |                              |                  |                   |                  |                 |
| H                     | F55A     | 5.63                          | 0.99                          | -2.39                        | 0.44                         | 6.67             | -0.78             | 5.90             | 0.31            |
| H                     | H59A     | 3.02                          | 0.93                          | -1.28                        | 0.36                         | 3.04             | -0.42             | 2.62             | 0.39            |
| H                     | I54A     | 3.41                          | 0.08                          | -0.84                        | 0.10                         | 2.75             | -0.48             | 2.27             | 0.84            |
| H                     | F108A    | 1.55                          | -0.03                         | 0.22                         | -0.04                        | 1.70             | -0.15             | 1.55             | 0.37            |
| H                     | I52A     | 2.38                          | 0.05                          | -0.71                        | -0.07                        | 1.65             | -0.16             | 1.49             | 0.24            |
| L                     | W94A     | 2.39                          | 2.70                          | -3.11                        | 0.20                         | 2.18             | -0.88             | 1.30             | 1.22            |
| H                     | K57A     | 1.77                          | 10.84                         | -10.33                       | 0.53                         | 2.81             | -1.56             | 1.25             | 0.57            |

<sup>a</sup>Standard deviation of  $\Delta\Delta G$ .

**Table S4.** Comparison of hotspots and warm spots in PD-L1/KN035 (PDB code 5JDS) and PD-L1/atezolizumab (PDB code 5XXY) by ASIE, m-CSM and Fold-X methods. The data with  $\Delta\Delta G$  value greater than 2 kcal/mol are bold, and the hotspots in the column of “Mutation” are bold. All values are in kcal/mol.

| Chain                                  | Mutation     | $\Delta\Delta G_{ASIE}$ | $\Delta\Delta G_{m-CSM}$ | $\Delta\Delta G_{Fold-X}$ | $\Delta\Delta G_{exp}^a$ |
|----------------------------------------|--------------|-------------------------|--------------------------|---------------------------|--------------------------|
| <b>(A) PD-L1 in PD-L1/KN035</b>        |              |                         |                          |                           |                          |
| A                                      | <b>Y56A</b>  | <b>4.62</b>             | <b>3.64</b>              | <b>5.92</b>               | <b>3.57</b>              |
| A                                      | <b>R113A</b> | <b>4.59</b>             | -0.06                    | <b>2.35</b>               | <b>3.07</b>              |
| A                                      | <b>Q66A</b>  | <b>3.97</b>             | 1.24                     | <b>2.54</b>               | <b>3.02</b>              |
| A                                      | <b>M115A</b> | <b>3.20</b>             | 0.51                     | <b>3.95</b>               | 1.73                     |
| A                                      | <b>Y123A</b> | <b>3.12</b>             | 1.27                     | 0.38                      | 1.58                     |
| A                                      | <b>I54A</b>  | <b>2.72</b>             | 0.67                     | <b>3.24</b>               | <b>2.60</b>              |
| A                                      | <b>E58A</b>  | <b>2.14</b>             | 1.62                     | 1.49                      | <b>2.31</b>              |
| A                                      | N63A         | 1.46                    | 0.36                     | -0.55                     | 1.21                     |
| A                                      | D73A         | 1.33                    | 0.37                     | -1.02                     | ND <sup>c</sup>          |
| A                                      | V68A         | 1.08                    | 0.54                     | 2.33                      | 1.31                     |
| A                                      | S117A        | 0.77                    | 0.33                     | -1.32                     | 0.85                     |
| A                                      | D61A         | 0.42                    | 1.91                     | 1.60                      | 1.12                     |
| <b>MAE<sup>b</sup></b>                 |              | <b>0.76</b>             | <b>1.10</b>              | <b>1.26</b>               |                          |
| <b>R<sup>d</sup></b>                   |              | <b>0.88</b>             | <b>0.42</b>              | <b>0.73</b>               |                          |
| <b>(B) KN035</b>                       |              |                         |                          |                           |                          |
| <b>B</b>                               | <b>F101A</b> | <b>7.25</b>             | <b>4.63</b>              | <b>4.07</b>               | ND <sup>c</sup>          |
| <b>B</b>                               | <b>Q116A</b> | <b>4.39</b>             | 1.54                     | -0.96                     | ND <sup>c</sup>          |
| B                                      | T105A        | 1.50                    | <b>2.14</b>              | 0.79                      | ND <sup>c</sup>          |
| B                                      | V109A        | 1.25                    | 1.00                     | 1.44                      | ND <sup>c</sup>          |
| B                                      | L108A        | 1.16                    | 0.53                     | 1.15                      | ND <sup>c</sup>          |
| B                                      | S111A        | 1.16                    | 1.39                     | -0.74                     | ND <sup>c</sup>          |
| B                                      | F115A        | 1.13                    | 0.70                     | <b>3.44</b>               | ND <sup>c</sup>          |
| B                                      | R32A         | 0.96                    | 1.30                     | 1.78                      | ND <sup>c</sup>          |
| <b>(C) PD-L1 in PD-L1/atezolizumab</b> |              |                         |                          |                           |                          |
| A                                      | <b>M115A</b> | <b>4.07</b>             | 0.52                     | <b>3.04</b>               | 0.90                     |
| A                                      | <b>R113A</b> | <b>3.61</b>             | 1.68                     | -2.06                     | 1.27                     |
| A                                      | <b>Y56A</b>  | <b>2.50</b>             | 0.49                     | <b>2.61</b>               | 0.59                     |
| A                                      | <b>E58A</b>  | <b>2.10</b>             | <b>3.22</b>              | -0.36                     | 1.72                     |
| A                                      | I54A         | 1.69                    | 0.32                     | <b>2.12</b>               | 0.69                     |
| A                                      | Y123A        | 1.65                    | <b>2.63</b>              | 0.77                      | 0.92                     |
| A                                      | R125A        | 1.58                    | <b>2.20</b>              | 0.19                      | 1.06                     |
| A                                      | D61A         | 1.19                    | 0.58                     | -0.97                     | 0.00                     |
| A                                      | N63A         | 0.89                    | 0.63                     | -2.51                     | 0.31                     |
| A                                      | Q66A         | 0.61                    | 0.62                     | -1.96                     | -0.82                    |
| <b>MAE<sup>b</sup></b>                 |              | <b>1.33</b>             | <b>0.80</b>              | <b>1.70</b>               |                          |
| <b>R<sup>d</sup></b>                   |              | <b>0.6</b>              | <b>0.67</b>              | <b>0.28</b>               |                          |
| <b>(D) atezolizumab</b>                |              |                         |                          |                           |                          |
| <b>H</b>                               | <b>Y54A</b>  | <b>6.36</b>             | <b>4.17</b>              | -0.44                     | ND <sup>c</sup>          |
| <b>H</b>                               | <b>W33A</b>  | <b>3.59</b>             | <b>3.44</b>              | 1.62                      | ND <sup>c</sup>          |
| <b>H</b>                               | <b>W50A</b>  | <b>2.68</b>             | 0.73                     | 1.91                      | ND <sup>c</sup>          |
| <b>H</b>                               | <b>R99A</b>  | <b>2.62</b>             | <b>2.60</b>              | -3.05                     | ND <sup>c</sup>          |
| <b>H</b>                               | <b>W101A</b> | <b>2.38</b>             | <b>3.82</b>              | <b>2.76</b>               | ND <sup>c</sup>          |

|   |      |      |      |      |                 |
|---|------|------|------|------|-----------------|
| L | L92A | 1.55 | 1.40 | 0.93 | ND <sup>c</sup> |
| H | Y59A | 1.50 | 1.04 | 1.84 | ND <sup>c</sup> |
| L | H94A | 1.40 | 1.40 | 0.91 | ND <sup>c</sup> |

<sup>a</sup>The experimental data are from Tables 1 and 2.

<sup>b</sup>Mean absolute error.

<sup>c</sup>No data from experiment.

<sup>d</sup>Correlation coefficient.

**Table S5.** The stabilizing residues (SR) which are important for the folding of mAbs are predicted by SRide method. 0 denotes null spot, and 1 denotes SR, BR or KR detected by the SRide and ASIE method.

| <b>Residue</b>                | <b>SR<sup>a</sup></b> | <b>BR<sup>b</sup></b> | <b>KR<sup>c</sup></b> |
|-------------------------------|-----------------------|-----------------------|-----------------------|
| <b>(A) PD-L1/KN035</b>        |                       |                       |                       |
| <b>KN035W36</b>               | <b>1</b>              | <b>0</b>              | <b>0</b>              |
| <b>(B) PD-L1/atezolizumab</b> |                       |                       |                       |
| <b>HW36</b>                   | <b>1</b>              | <b>0</b>              | <b>0</b>              |
| <b>HV126</b>                  | 1                     | 0                     | 0                     |
| <b>HC145</b>                  | 1                     | 0                     | 0                     |
| <b>HY150</b>                  | 1                     | 0                     | 0                     |
| <b>HY181</b>                  | 1                     | 0                     | 0                     |
| <b>HS182</b>                  | 1                     | 0                     | 0                     |
| <b>HC201</b>                  | 1                     | 0                     | 0                     |
| <b>LW35</b>                   | 1                     | 0                     | 0                     |
| <b>LV115</b>                  | 1                     | 0                     | 0                     |
| <b>(C) PD-L1/avelumab</b>     |                       |                       |                       |
| ND <sup>d</sup>               | ND <sup>d</sup>       | ND <sup>d</sup>       | ND <sup>d</sup>       |
| <b>(D) PD-L1/durvalumab</b>   |                       |                       |                       |
| <b>BW36</b>                   | <b>1</b>              | <b>0</b>              | <b>0</b>              |
| <b>BV129</b>                  | 1                     | 0                     | 0                     |
| <b>BC148</b>                  | 1                     | 0                     | 0                     |
| <b>BV150</b>                  | 1                     | 0                     | 0                     |
| <b>BY153</b>                  | 1                     | 0                     | 0                     |
| <b>BY184</b>                  | 1                     | 0                     | 0                     |
| <b>BC204</b>                  | 1                     | 0                     | 0                     |
| <b>CL34</b>                   | 1                     | 0                     | 0                     |
| <b>CW36</b>                   | 1                     | 0                     | 0                     |
| <b>CI49</b>                   | 1                     | 0                     | 0                     |
| <b>CQ90</b>                   | 1                     | 0                     | 0                     |
| <b>CQ91</b>                   | 1                     | 0                     | 0                     |
| <b>CC135</b>                  | 1                     | 0                     | 0                     |
| <b>(E) PD-L1/BMS-936559</b>   |                       |                       |                       |
| <b>HW36</b>                   | <b>1</b>              | <b>0</b>              | <b>0</b>              |
| <b>HM48</b>                   | 1                     | 0                     | 0                     |
| <b>HR98</b>                   | 1                     | 0                     | 0                     |
| <b>HV131</b>                  | 1                     | 0                     | 0                     |
| <b>HC150</b>                  | 1                     | 0                     | 0                     |
| <b>HV152</b>                  | 1                     | 0                     | 0                     |
| <b>HY186</b>                  | 1                     | 0                     | 0                     |
| <b>HS187</b>                  | 1                     | 0                     | 0                     |
| <b>HC206</b>                  | 1                     | 0                     | 0                     |
| <b>LW35</b>                   | 1                     | 0                     | 0                     |
| <b>LV114</b>                  | 1                     | 0                     | 0                     |

<sup>a</sup>Stabilizing residues.

<sup>b</sup>Binding residues.

<sup>c</sup>Key residues which are the intersection of SR and BR.

<sup>d</sup>No SR is detected.
